# Supplementary figures and images for: Evolution of Three-Finger Toxin Genes in Neotropical Colubrine Snakes (Colubridae)
Source: MDPI journal article supplement (doi:10.3390/toxins15090523), 2023-08-25

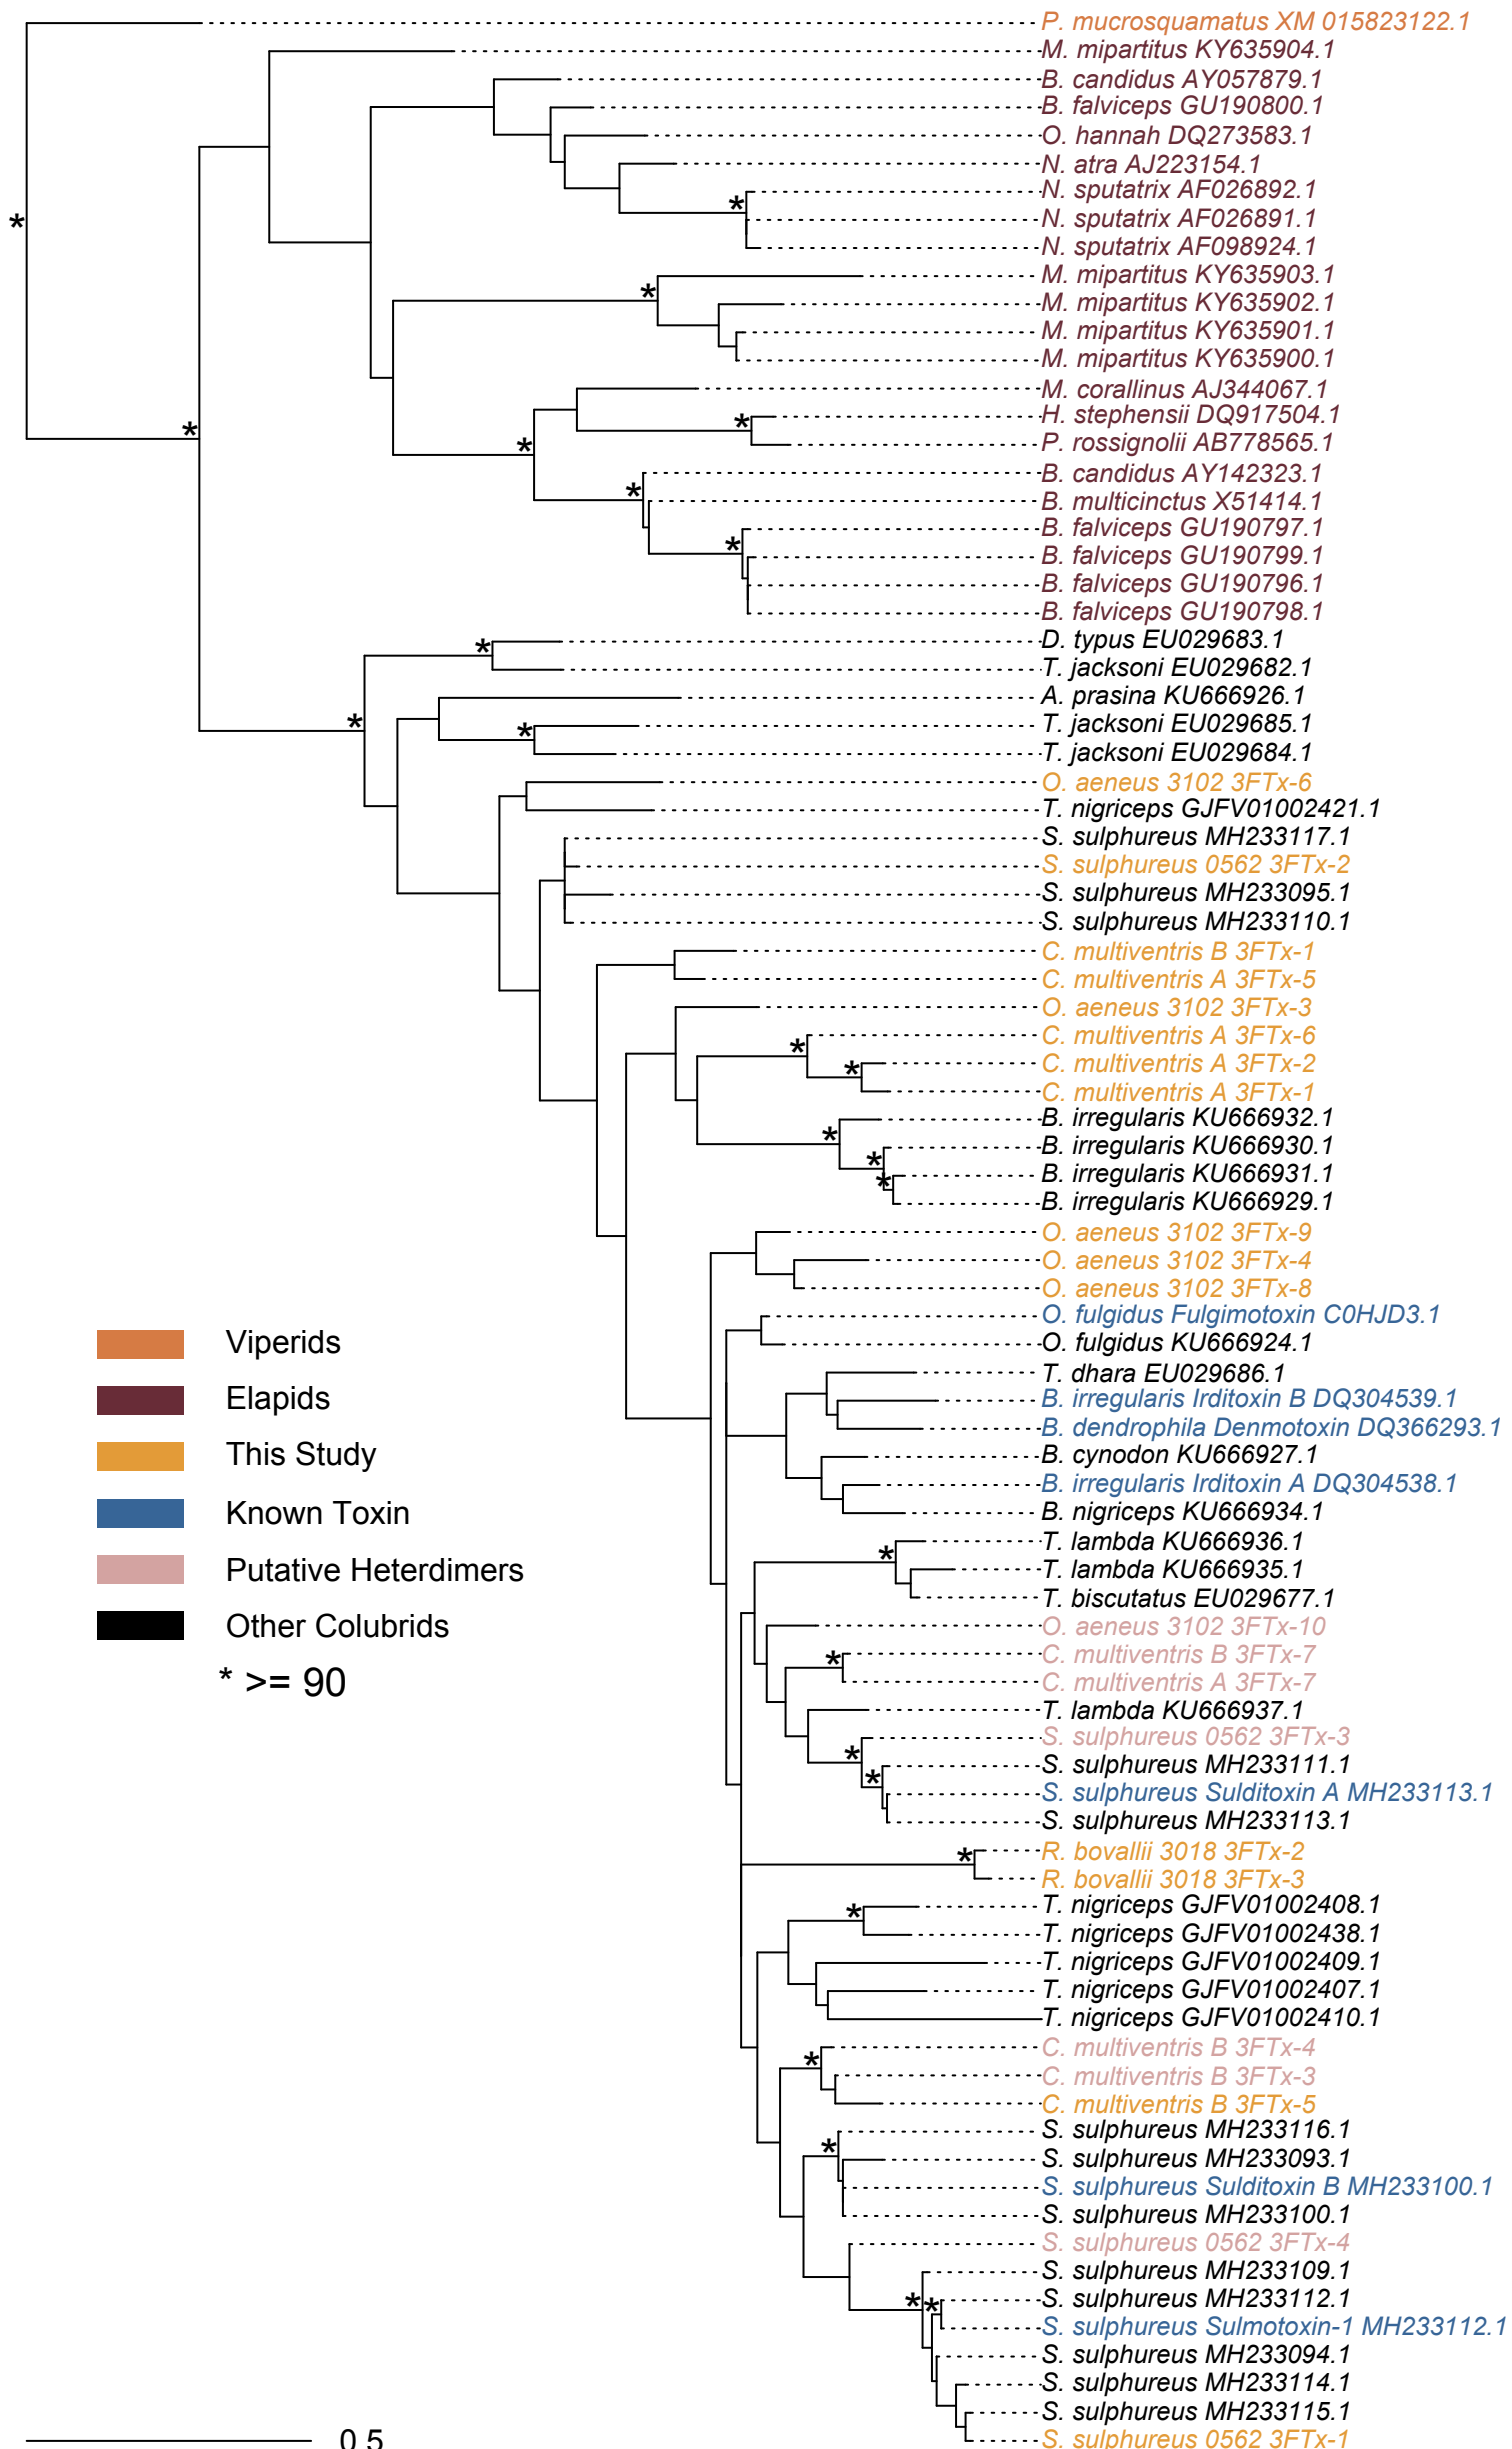

Supplement: s1 [file s1]
